# Supplementary material
Source: Springer Nature journal article supplement (https://www.springermedizin.de/resource/supplementary/12913_2009_1241_MOESM3_ESM.pdf/9527676)

## **Development**

1. Identifying the evidence base
2. Identifying and developing theory
3. Modelling process and outcomes

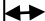

## **Feasibility/ piloting**

1. Testing procedures
2. Estimating recruitment/retention
3. Determining sample size

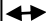

## **Evaluation**

1. Assessing effectiveness
2. Understanding change process
3. Assessing cost-effectiveness

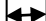

## **Implementation**

1. Dissemination
2. Surveillance and monitoring
3. Long term follow up

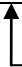

Supplement: MOESM3 [file 9527676]
